# Supplementary material for: Neuroprotective effects of donepezil against cholinergic depletion
Source: PubMed Central journal article supplement (PMC3978431; doi:10.1186/alzrt215), 2013-10-24
Supplement: alzrt215-S1.pdf [file alzrt215-S1.pdf]

## ELEVATED PLUS MAZE

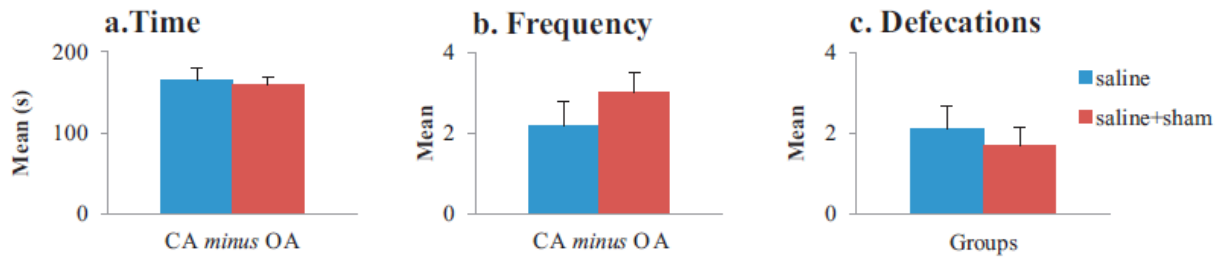

## OPEN FIELD

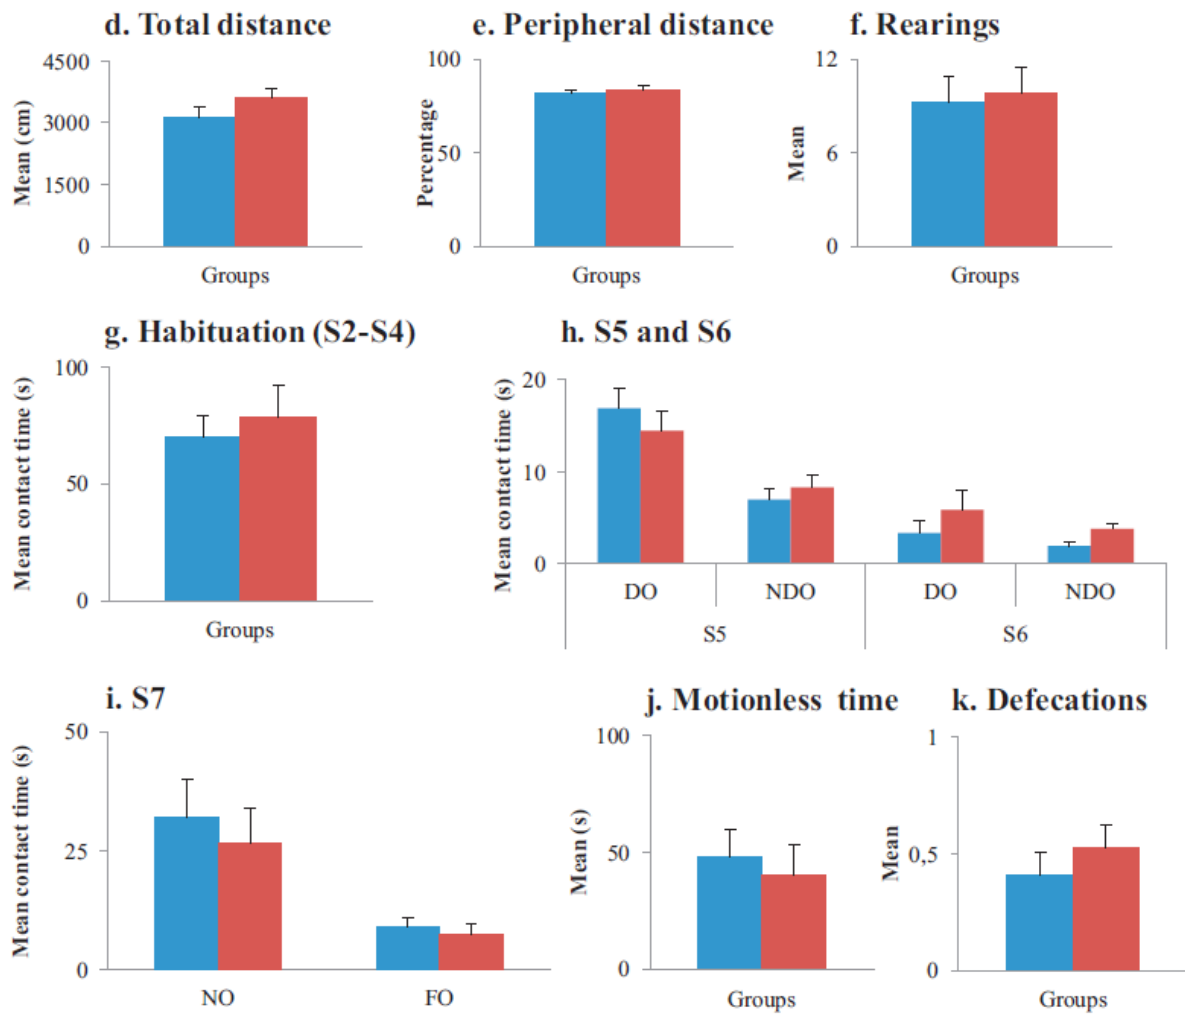

## RADIAL ARM MAZE

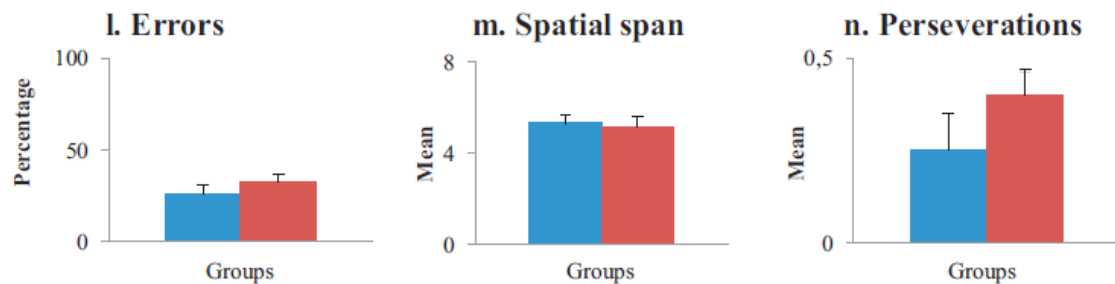

## SOCIABILITY

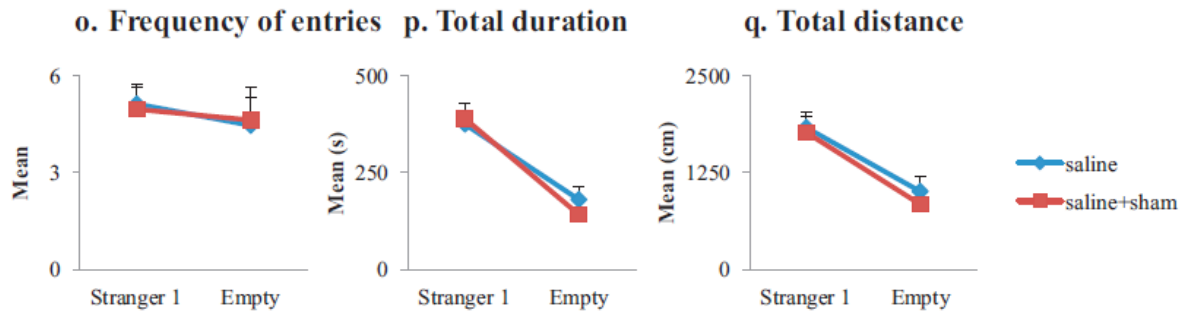

## PREFERENCE FOR SOCIAL NOVELTY TEST

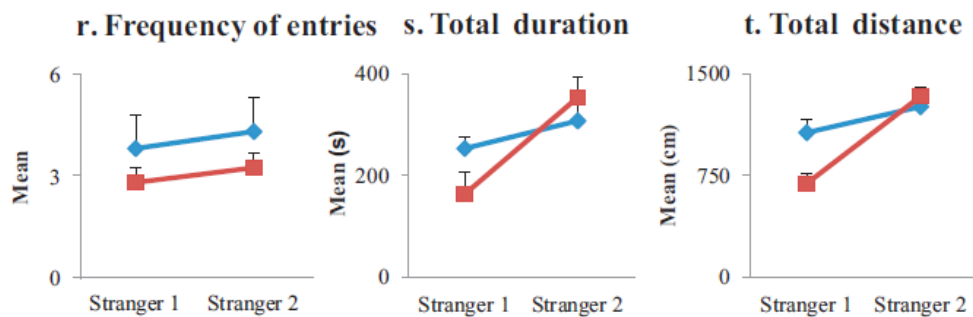

## FEAR CONDITIONING

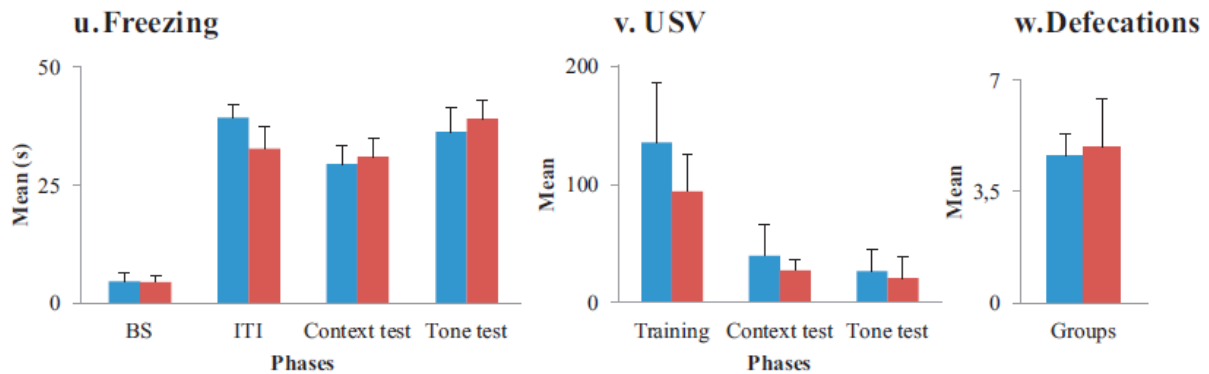

**Additional file 1. Data of intact rats treated with saline alone (saline) and rats treated with saline and subjected to sham lesion (saline+sham) are depicted. ELEVATED PLUS MAZE parameters:** mean time (a) and frequency of entries (b) in the Closed Arms (CA) *minus* Open Arms (OA); number of defecations (c). **OPEN FIELD parameters:** total (d) and peripheral (e) distances travelled in session 1 (S1); number of rearings (f); mean contact time with objects during habituation (S2-S4) (g), spatial change (S5, S6) (h), and novelty (S7) (i); motionless time (j); number of defecations (k). **RADIAL ARM MAZE parameters:** percentage of errors (l); spatial span (m); perseverations (n). **SOCIABILITY parameters:** frequency of entries (o); duration of time spent (p) and distance travelled in each chamber (q). **PREFERENCE FOR SOCIAL NOVELTY TEST parameters:** frequency of entries (r); duration of time spent (s) and distance travelled in each chamber (t). **FEAR CONDITIONING parameters:** freezing time (u); number of ultrasonic vocalizations, USV (v); defecations (w). Not statistically significant differences were found between saline and saline+sham rats. Data are expressed as mean  $\pm$  SEM.
