# Supplementary material for: Neuroprotective effects of donepezil against cholinergic depletion
Source: PubMed Central journal article supplement (PMC3978431; doi:10.1186/alzrt215), 2013-10-24
Supplement: alzrt215-S4.pdf [file alzrt215-S4.pdf]

| <b>SBJs EMITTING</b>              | <b>CONTEXT</b> |
|-----------------------------------|----------------|
| Don-Sham                          | 3/7            |
| Sal-Sham                          | 7/12           |
| Don-Sap                           | 2/8            |
| Sal-Sap                           | 0/8            |
| <b>DURATION (ms)</b>              |                |
| Don-Sham                          | 1.21 ± 0.14    |
| Sal-Sham                          | 1.19 ± 0.19    |
| Don-Sap                           | 1.50 ± 0.71    |
| Sal-Sap                           | -              |
| <b>FREQUENCY MODULATION (kHz)</b> |                |
| Don-Sham                          | 4.99 ± 1.09    |
| Sal-Sham                          | 4.38 ± 3.28    |
| Don-Sap                           | 2.75 ± 4.48    |
| Sal-Sap                           | -              |
| <b>PEAK FREQUENCY (kHz)</b>       |                |
| Don-Sham                          | 23.81 ± 0.80   |
| Sal-Sham                          | 23.41 ± 0.43   |
| Don-Sap                           | 26.67 ± 2.82   |
| Sal-Sap                           | -              |
| <b>PEAK AMPLITUDE (dB)</b>        |                |
| Don-Sham                          | -51.48 ± 4.71  |
| Sal-Sham                          | -36.82 ± 3.24  |
| Don-Sap                           | -43.29 ± 7.73  |
| Sal-Sap                           | -              |

**Additional file 4. Table of the main spectrographic parameters of USVs emitted during the context test.** Values represent mean ± *SEM*.
